# Supplementary material for: The current state of genetic risk models for the development of kidney cancer: a review and validation
Source: PubMed Central journal article supplement (PMC9790357; doi:10.1111/bju.15752), 2022-05-07
Supplement: BJU-130-550-s004.pdf [file BJU-130-550-s004.pdf]

| Rs Number  | SNP              | Alternative Name | Effect Allele | MAF (UKB) | Imputation Score | Study                                                             |
|------------|------------------|------------------|---------------|-----------|------------------|-------------------------------------------------------------------|
| rs4253211  | 10:50678317_C_T  | ERCC6 Arg1230Pro | C             | 9.76E-05  | 0.54             | Lin2008                                                           |
| rs2266637  | 22:24376845_C_T  | GSTT1            | A (T)         | 1.11E-04  | 0.76             | Coric2017                                                         |
| rs2020955  | 16:14038659_T_C  | XPF Pro662Ser    | T             | 0.01      | 0.93             | Lin2008                                                           |
| rs1048943  | 15:75012985_T_C  | CYP1A1 Ile/Val   | C             | 0.03      | 0.98             | Chen2011                                                          |
| rs5955543  | X:17698397_A_G   |                  | G             | 0.02      | 1.00             | Fritsche2018, Fritsche2021                                        |
| rs2283873  | 22:31013296_G_A  |                  | A             | 0.03      | 1.00             | Fritsche2018, Fritsche2021                                        |
| rs13086983 | 3:40574734_C_T   |                  | G             | 0.04      | 1.00             | Fritsche2021                                                      |
| rs74911261 | 11:108357137_G_A |                  | A             | 0.02      | 1.00             | Scelo2016, Shi2019, Kachuri2020, Jia2020, Graff2021, Fritsche2021 |
| rs1065411  | 1:110233138_G_C  | GSTM1            | G             | 0.33      | 0.71             | Coric2017                                                         |
| rs13172201 | 5:1271661_T_C    |                  | T             | 0.25      | 0.90             | DeMartino2016                                                     |
| rs2853677  | 5:28837505_A_C   |                  | G             | 0.35      | 0.96             | DeMartino2016                                                     |
| rs6772228  | 3:58376019_T_A   |                  | T             | 0.05      | 0.96             | Machiela2017                                                      |
| rs4765623  | 12:125320850_C_T |                  | T             | 0.34      | 0.96             | Scelo2016, Kachuri2020, Jia2020, Graff2021                        |
| rs321986   | 7:78298061_G_C   | ERCC1 3'UTR      | C             | 0.37      | 0.97             | Lin2008                                                           |
| rs12105918 | 2:145208193_T_C  |                  | C             | 0.06      | 0.97             | Scelo2016, Shi2019, Kachuri2020, Jia2020, Graff2021               |
| rs6773576  | 3:45117173_A_G   | CDCP1 (gene)     | A             | 0.19      | 0.97             | Wei2014                                                           |
| rs2736098  | 5:1294086_C_T    |                  | G (C)         | 0.28      | 0.98             | DeMartino2016                                                     |
| rs8007348  | 14:73272730_C_A  |                  | A             | 0.26      | 0.98             | Kachuri2020, Graff2021                                            |
| rs6470588  | 8:128889371_A_C  |                  | C             | 0.48      | 0.98             | Scelo2016, Jia2020                                                |
| rs67311347 | 3:40533243_G_A   |                  | G             | 0.30      | 0.98             | Scelo2016, Kachuri2020, Jia2020, Graff2021                        |
| rs2241261  | 8:22876739_C_T   |                  | T             | 0.48      | 0.98             | Scelo2016, Shi2019, Kachuri2020, Jia2020, Graff2021, Fritsche2021 |
| rs4430311  | 1:244015993_C_T  |                  | G (C)         | 0.33      | 0.98             | Jia2020, Graff2021, Fritsche2021                                  |
| rs1049380  | 12:26489544_G_T  |                  | C (G)         | 0.27      | 0.98             | Shu2013                                                           |
| rs3807987  | 7:116179834_G_A  | Cav-1 G14713A    | A             | 0.07      | 0.99             | Wu2016                                                            |
| rs7804372  | 7:116194228_T_A  | Cav-1 T29107A    | A             | 0.25      | 0.99             | Chang2014                                                         |
| rs4646903  | 15:75011641_A_G  | CYP1A1 MspI      | G             | 0.11      | 0.99             | Chang2014                                                         |
| rs1900925  | 11:132140629_A_G | IL-13 C-1055T    | T             | 0.34      | 0.99             | Chen2011                                                          |
| rs1805010  | 16:27356203_A_G  | IL-4R Ile50Val   | T             | 0.45      | 0.99             | Chu2012                                                           |
| rs3957357  | 6:52668687_A_G   | GSTA1            | G             | 0.12      | 0.99             | Chu2012                                                           |
| rs12617313 | 2:46559776_A_T   |                  | T             | 0.48      | 0.99             | Coric2017                                                         |
| rs7697932  | 4:101005318_A_G  |                  | G             | 0.33      | 0.99             | Jia2020                                                           |
| rs6755594  | 2:46589295_A_G   |                  | G             | 0.38      | 0.99             | Kachuri2020, Graff2021                                            |
| rs714024   | 22:47013535_C_T  |                  | G             | 0.40      | 0.99             | Kachuri2020, Graff2021                                            |
| rs8106922  | 19:45401666_A_G  |                  | G             | 0.38      | 0.99             | Kachuri2020, Graff2021                                            |
| rs1805329  | 9:110084328_C_T  | RAD23B Ala249Val | G (C)         | 0.19      | 0.99             | Li2012                                                            |
| rs1800975  | 9:100459578_T_C  | XPA 5'UTR        | G (C)         | 0.32      | 0.99             | Lin2008                                                           |

|                     |                  |                       |       |      |                                                                            |
|---------------------|------------------|-----------------------|-------|------|----------------------------------------------------------------------------|
| rs755017            | 20:62421622_A_G  |                       | G     | 0.13 | 0.99 Machiela2017                                                          |
| rs11125529          | 2:54475866_C_A   |                       | A     | 0.14 | 0.99 Machiela2017                                                          |
| rs7675998           | 4:164007820_A_G  |                       | G     | 0.21 | 0.99 Machiela2017                                                          |
| rs3027234           | 17:8136092_C_T   |                       | C     | 0.22 | 0.99 Machiela2017                                                          |
| rs8105767           | 19:22215441_A_G  |                       | G     | 0.29 | 0.99 Machiela2017                                                          |
| rs11894252          | 2:46533376_T_C   |                       | T     | 0.41 | 0.99 Scelo2016, Kachuri2020, Graff2021<br>Scelo2016, Shi2019, Kachuri2020, |
| rs11813268          | 10:105682296_C_T |                       | T     | 0.16 | 0.99 Jia2020, Graff2021, Fritsche2021<br>Scelo2016, Shi2019, Kachuri2020,  |
| rs10936602          | 3:169536637_T_C  |                       | T     | 0.25 | 0.99 Jia2020, Graff2021, Fritsche2021<br>Scelo2016, Shi2019, Kachuri2020,  |
| rs4381241           | 1:50907438_T_C   |                       | C     | 0.47 | 0.99 Jiia2020, Graff2021, Fritsche2021<br>Shi2019, Kachuri2020, Jia2020,   |
| rs3845536           |                  |                       | C     | 0.37 | 0.99 Graff2021                                                             |
| rs12031994          | 1:243917309_T_C  |                       | A (T) | 0.14 | 0.99 Shu2013                                                               |
| rs3766673           | 1:243720473_T_C  |                       | G (C) | 0.18 | 0.99 Shu2013                                                               |
| rs2345994           | 1:243932275_T_C  |                       | A (T) | 0.33 | 0.99 Shu2013                                                               |
| rs3746444           | 20:33578251_A_G  | hsa-mir-499T/C        | C (G) | 0.18 | 0.99 Verma2015                                                             |
| rs11614913          | 12:54385599_C_T  | hsa-mir-196a2C/T      | T     | 0.41 | 0.99 Verma2015                                                             |
| rs10982724          | 9:118157729_T_C  | DEC1 (gene)           | G (C) | 0.12 | 0.99 Wei2014                                                               |
| rs9607241           | 22:22104873_A_C  | MAPK1 (gene)          | C     | 0.41 | 0.99 Wei2014                                                               |
| rs743409            | 22:22129215_A_G  | MAPK1 (gene)          | A     | 0.48 | 0.99 Wei2014                                                               |
| rs2228001           | 3:14187449_G_T   | XPC Lys939Gln         | C (G) | 0.39 | 1.00 Lin2008                                                               |
| rs20541             | 5:131995964_A_G  | IL-13 Arg130Gln       | A     | 0.18 | 1.00 Chu2012                                                               |
| rs1695              | 11:67352689_X_X  | GSTP1                 | G     | 0.35 | 1.00 Coric2017                                                             |
| rs10069690          | 5:28837168_C_T   |                       | C     | 0.27 | 1.00 DeMartino2016                                                         |
| rs7726159           | 5:28837302_C_A   |                       | A     | 0.33 | 1.00 DeMartino2016                                                         |
| rs2736100           | 5:1286516_C_A    |                       | C     | 0.49 | 1.00 DeMartino2016, Machiela2017                                           |
| rs807624            | 2:15782471_G_T   |                       | T     | 0.37 | 1.00 Fritsche2018                                                          |
| rs2495478           | 1:55512995_G_A   | -                     | A     | 0.05 | 1.00 Fritsche2018                                                          |
| rs1027643           | 5:91893792_C_T   | -                     | T     | 0.06 | 1.00 Fritsche2018, Fritsche2021                                            |
| rs3755132           | 2:15729820_A_G   |                       | G     | 0.16 | 1.00 Fritsche2018, Fritsche2021                                            |
| rs790356            | 11:83620787_A_G  |                       | G     | 0.49 | 1.00 Fritsche2018, Fritsche2021                                            |
| rs234043            | 3:172313367_T_C  |                       | G     | 0.28 | 1.00 Kachuri2020, Graff2021                                                |
| rs4953346           | 2:46558208_T_G   |                       | G     | 0.46 | 1.00 Kachuri2020, Graff2021                                                |
| rs2228526           | 10:50678717_T_C  | ERCC6 Met1097Val      | G (C) | 0.19 | 1.00 Lin2008                                                               |
| rs2266690/rs2230641 | 5:86695274_A_G   | CCNH Val270Ala        | C (G) | 0.20 | 1.00 Lin2008                                                               |
| rs17655             | 13:103528002_G_C | XPG Asp110His         | C     | 0.21 | 1.00 Lin2008                                                               |
| rs2228000           | 3:14199887_G_A   | XPC Ala499Val         | T (A) | 0.24 | 1.00 Lin2008                                                               |
| rs1799793           | 19:45867259_C_T  | XPD Asp312Asn         | A (T) | 0.32 | 1.00 Lin2008                                                               |
| rs1052559           | 19:45854919_T_G  | XPD Lys751Gln/rs13181 | C (G) | 0.36 | 1.00 Lin2008                                                               |

|            |                  |                    |         |                            |                                                                     |
|------------|------------------|--------------------|---------|----------------------------|---------------------------------------------------------------------|
| rs9420907  | 10:105676465_C_A |                    | C       | 0.13                       | 1.00 Machiela2017                                                   |
| rs10936599 | 3:169492101_C_T  |                    | C       | 0.24                       | 1.00 Machiela2017                                                   |
| rs4903064  | 14:73279420_T_C  |                    | C       | 0.23                       | 1.00 Graff2021, Fritsche2021<br>Scelo2016, Kachuri2020, Jia2020,    |
| rs7105934  | 11:69239741_G_A  |                    | G       | 0.09                       | 1.00 Jia2020, Graff2021                                             |
| rs7579899  |                  |                    | A       | 0.41                       | 1.00 Shi2019, Jia2020                                               |
| rs4132509  | 1:243943084_C_A  |                    | A       | 0.18                       | 1.00 Shu2013                                                        |
| rs1058304  | 1:243664857_C_T  |                    | G (C)   | 0.24                       | 1.00 Shu2013                                                        |
| rs406271   | 3:195776976_T_C  | TFRC (gene)        | G (C)   | 0.31                       | 1.00 Wei2014                                                        |
| rs10054504 | 5:32000483_T_C   |                    | T       | 0.12                       | 1.00 Wu2016                                                         |
| rs7023329  | 9:21816528_A_G   | MTAP (gene)        | A       | 0.49                       | 1.00 Wu2016                                                         |
| rs718314   | 12:26453283_A_G  |                    | G       | 0.24                       | 1.00 Wu2016, Scelo2016, Shi2019,<br>Kachuri2020, Jia2020, Graff2021 |
| rs10735810 |                  | VDR FokI           | unknown | not included in validation | Arjumand2012                                                        |
| rs1544410  |                  | BsmI               | unknown | not included in validation | Arjumand2012                                                        |
| rs1799782  |                  | XRCC1 (Arg194TRrp) | T       | not included in validation | Hsueh2017                                                           |
| rs182052   |                  | ADIPOQ (gene)      | A       | not included in validation | Hsueh2018                                                           |
| rs2241766  |                  | ADIPOQ (gene)      | T       | not included in validation | Hsueh2018                                                           |
| rs1501299  |                  | ADIPOQ (gene)      | A       | not included in validation | Hsueh2018                                                           |
